# Supplementary material for: The fractal correlation between relaxation dynamics and atomic-level structures observed in metallic glasses by computer simulation
Source: Royal Society of Chemistry journal article supplement (doi:10.1039/c7cp02205k), 2017-01-01

## Supplementary material

**Fig. S1** The correlation between energy and temperature of  $\text{Ni}_{35}\text{Zr}_{65}$ ,  $\text{Ni}_{50}\text{Zr}_{50}$  and  $\text{Ni}_{65}\text{Zr}_{35}$  alloy upon rapidly quenching with the cooling rate of  $10^{13}$  K/s. One notes that the glass transition temperature  $T_g$  of  $\text{Ni}_{35}\text{Zr}_{65}$ ,  $\text{Ni}_{50}\text{Zr}_{50}$  and  $\text{Ni}_{65}\text{Zr}_{35}$  alloy are about 1000 K, 1100 K and 1200 K, respectively. In addition, all the alloy melts were first equilibrated at 2000 K for 200 ps, to reach relatively stable states at which the related dynamic variables show no secular variation, and then rapidly quenched down to the room temperature, obtaining the metallic glasses.

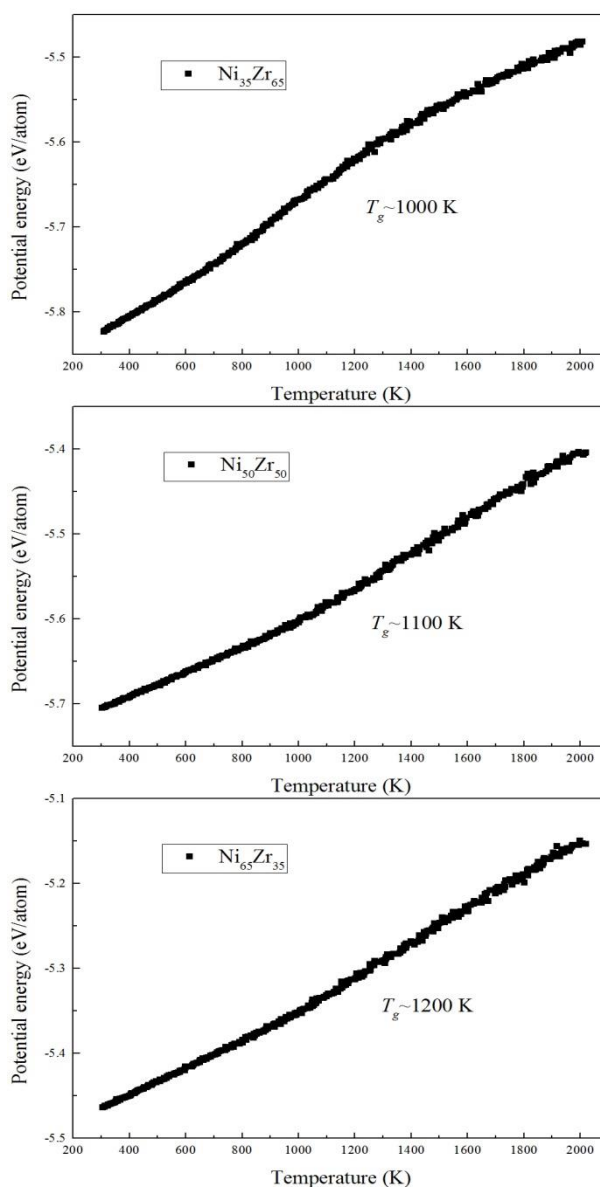

**Fig. S2** The fraction of activating atoms  $p(d \geq d^*)$  as a function of temperature  $T$  for  $\text{Ni}_{35}\text{Zr}_{65}$ ,  $\text{Ni}_{50}\text{Zr}_{50}$  and  $\text{Ni}_{65}\text{Zr}_{35}$  alloys, respectively.

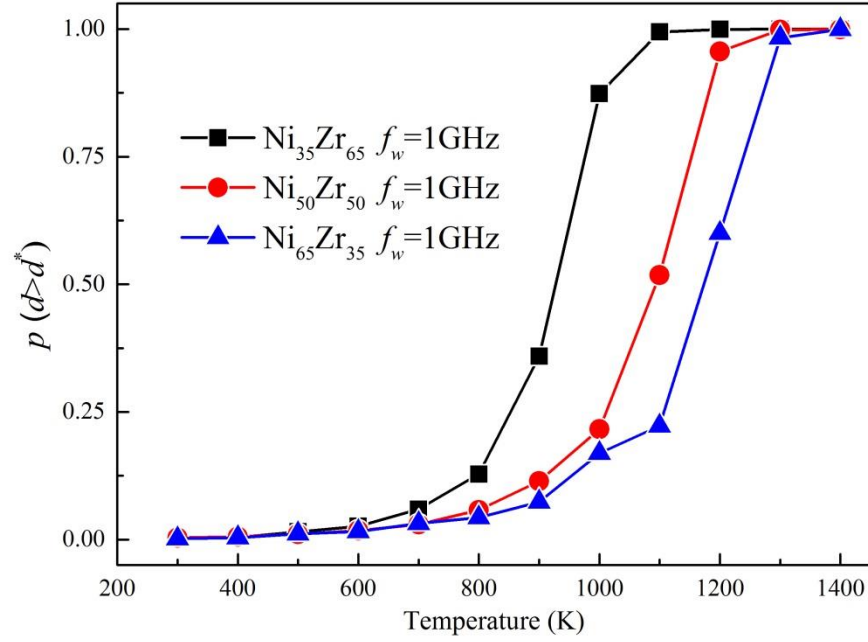

**Fig. S3** The fraction of the activating atoms in  $\text{Ni}_{65}\text{Zr}_{35}$  alloy with different frequency sinusoidal strain. It is shown that the maturing temperature correlates to the applying sinusoidal strain with frequencies.

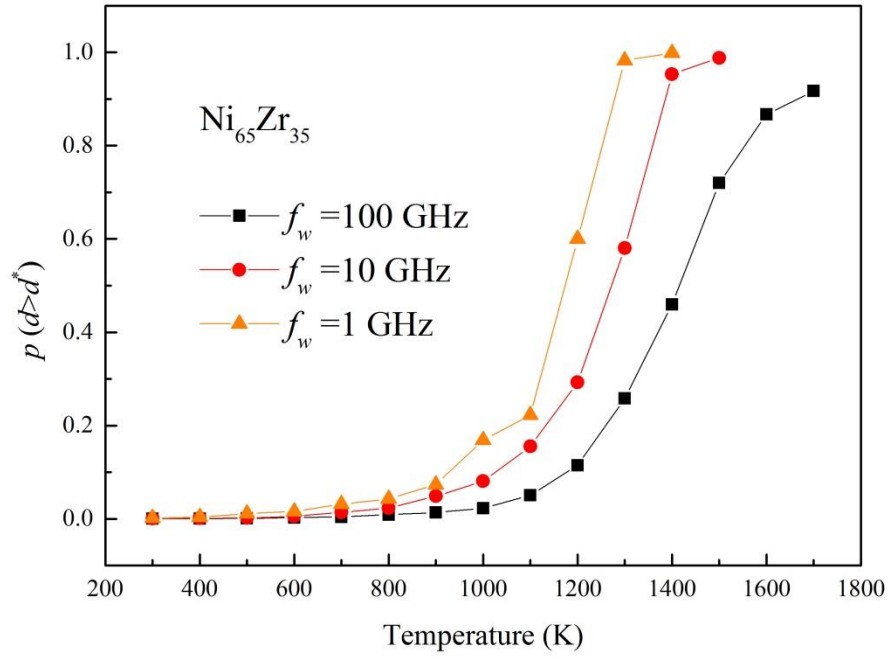

Supplement: c7cp02205k1.pdf [file c7cp02205k1.pdf]
